# Supplementary material for: Targeted DNA demethylation of the Fgf21 promoter by CRISPR/dCas9-mediated epigenome editing
Source: PubMed Central journal article supplement (PMC7083849; doi:10.1038/s41598-020-62035-6), 2020-03-20
Supplement: 41598_2020_62035_MOESM1_ESM.pdf [file 41598_2020_62035_MOESM1_ESM.pdf]

## **Supplementary information**

### **Targeted DNA demethylation of the *Fgf21* promoter by CRISPR/dCas9-mediated epigenome editing**

Nozomi Hanzawa, Koshi Hashimoto, Xunmei Yuan, Kenichi Kawahori, Kazutaka Tsujimoto, Miho Hamaguchi, Toshiya Tanaka, Yuya Nagaoka, Hiroshi Nishina, Sumiyo Morita, Izuho Hatada, Tetsuya Yamada, and Yoshihiro Ogawa

#### **Address all correspondence to:**

Koshi Hashimoto, M.D., Ph.D.

Department of Diabetes, Endocrinology and Hematology,

Dokkyo Medical University Saitama Medical Center,

2-1-50 Minami-Koshigaya, Koshigaya, Saitama 343-8555, Japan

Tel/Fax: +81-48-965-1111/8253. E-mail: k-hashimoto@dokkyomed.ac.jp

# Supplementary Figure 1

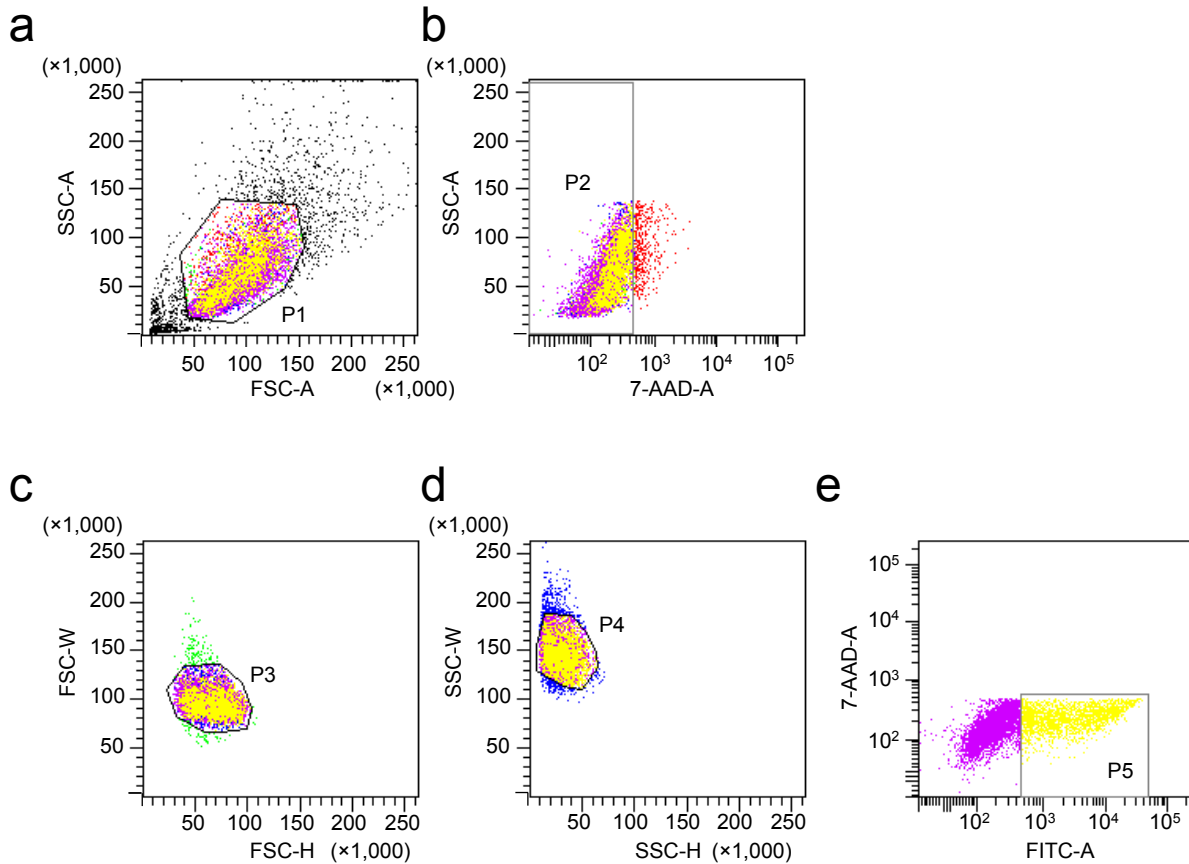

**f**

| Population   | #Events | %Parent | %Total |
|--------------|---------|---------|--------|
| ■ All Events | 10,000  | -       | 100.0  |
| ■ P1         | 8,396   | 84.0    | 84.0   |
| ■ P2         | 7,974   | 95.0    | 79.7   |
| ■ P3         | 7,782   | 97.6    | 77.8   |
| ■ P4         | 7,177   | 92.2    | 71.8   |
| ■ P5         | 1,936   | 27.0    | 19.4   |

# Supplementary Figure 2

a

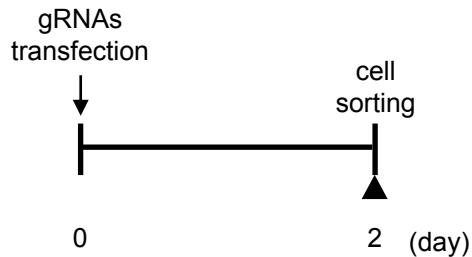

b

gRNA1 off target

CCACGAG**AATATCACGGTCAGG**

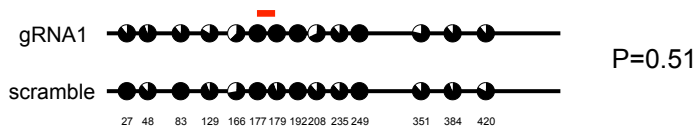

gRNA2 off target

ATAAACAG**CAAGTCCGGCAGTGG**

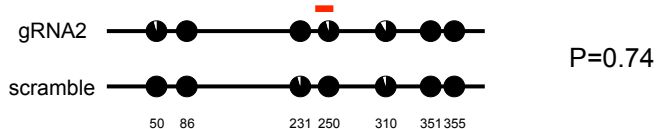

CCT**GAGTCCAAGTCCGGCAGTGG**

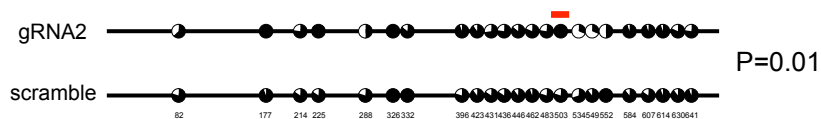

AAAG**TGTCCAAGTCCGGCAGTGG**

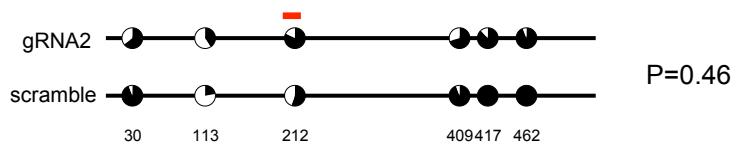

AACAACAA**CAAGTCCGGCAGTGG**

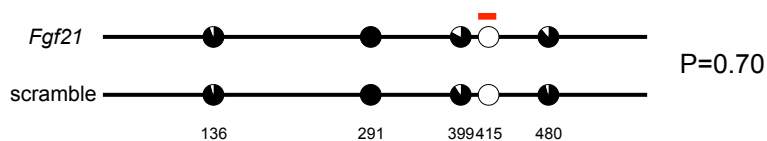

100bp

# Supplementary Figure 3

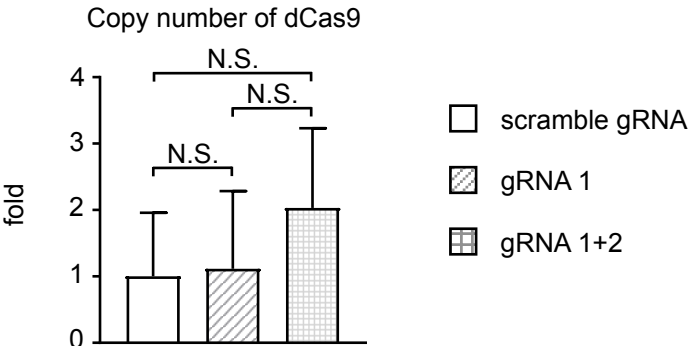

# Supplementary Figure 4

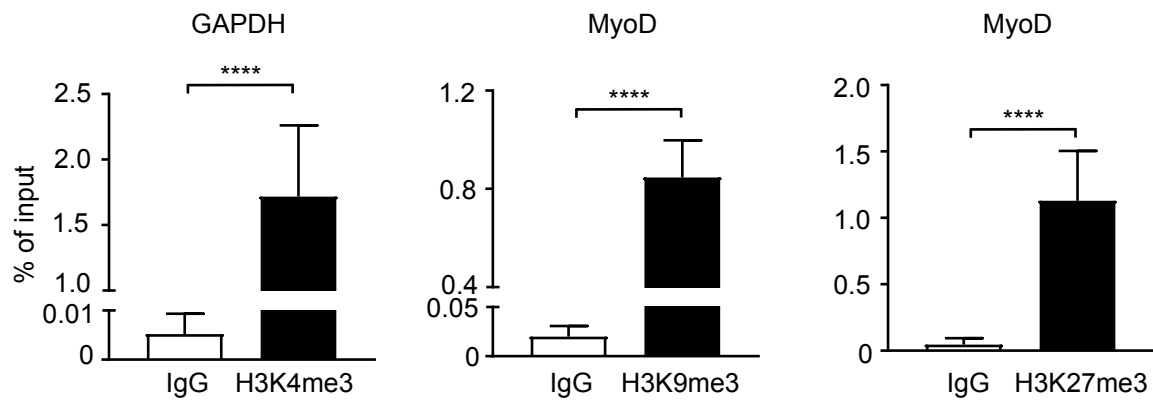

# Supplementary Figure 5

a

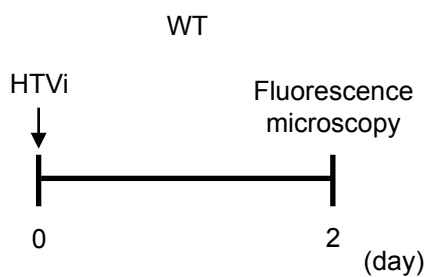

b

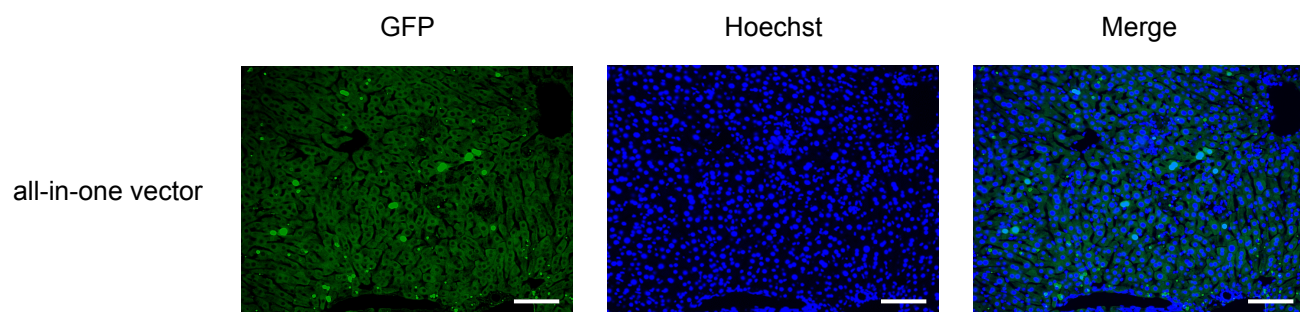

GFP positive cells :  $3.9 \pm 0.3\%$

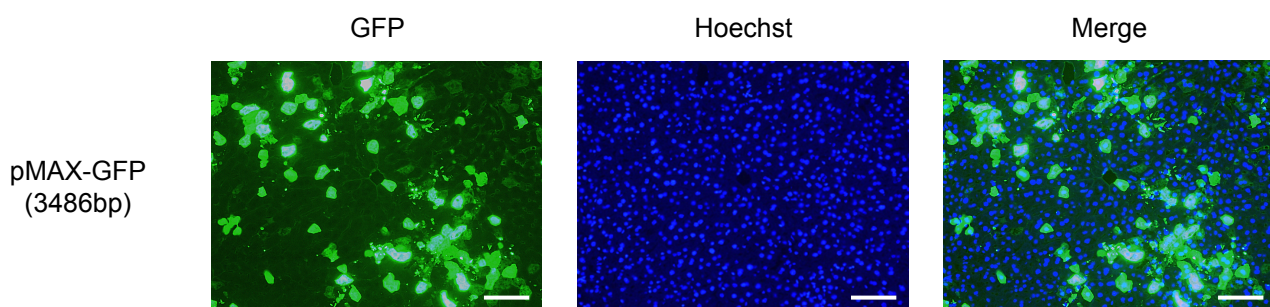

GFP positive cells :  $16.4 \pm 2.5\%$

# Supplementary Figure 6

a

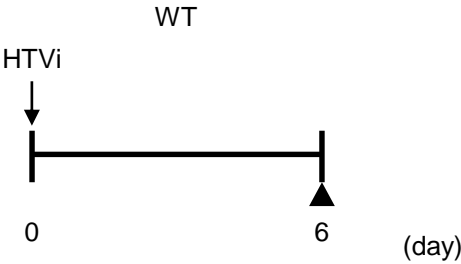

b

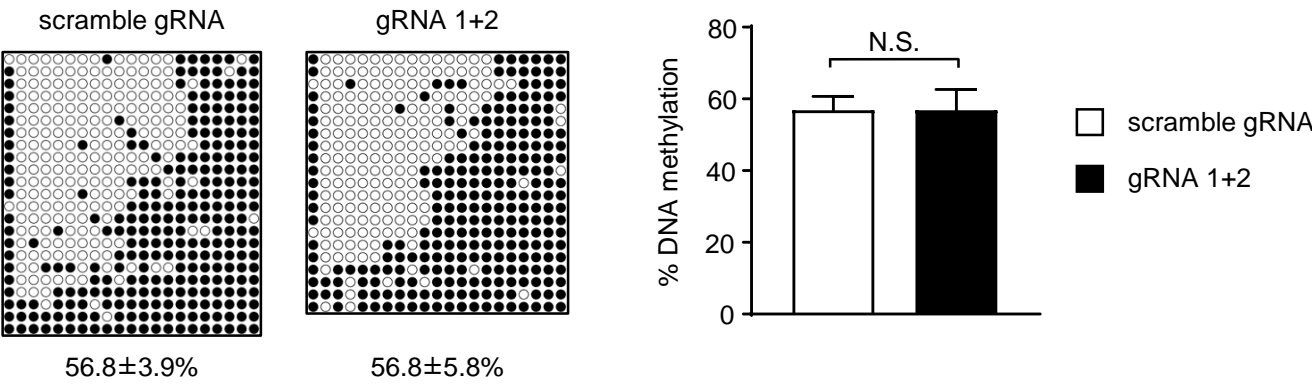

# Supplementary table 1

## a gRNA target sequences

| Target name | Target Sequence         |
|-------------|-------------------------|
| scramble    | GCACTACCAGAGCTAACTCA    |
| 1           | TGTGTCAAATATCACGCGTCAGG |
| 2           | TTGGGGGTCAAGTCCGGCAGAGG |

## b Primer sequences for RT-qPCR

| Gene           | Forward                 | Reverse               |
|----------------|-------------------------|-----------------------|
| <i>m36B4</i>   | GGCCCTGCACTCTCGCTTTC    | TGCCAGGACGCGCTTGT     |
| <i>mFgf21</i>  | CCTCTAGGTTTCTTTGCCAACAG | AAGCTGCAGGCCTCAGGAT   |
| <i>mDnmt1</i>  | GGCTTCAGTGGCATGAAC      | CTGCAGCCAAGATGATGG    |
| <i>mDnmt3a</i> | CATGAACAGGCCTTTGGCA     | TCTTGCAGCTCCAGCTTATC  |
| <i>mDnmt3b</i> | CCAAAAGGAGGCCATTAGAG    | GTACCCCGTTGCAATTCCAT  |
| <i>sfGFP</i>   | TTCTTTGTTTGGTCCGGCAG    | ATCCCACACCATGATGAGCA  |
| <i>TET1CD</i>  | GATCCGAACTGCCACCTG      | TCCTGCCCCAAGGTGTGTAT  |
| <i>dCas9</i>   | TGCCCCAAGTGAATATCGTG    | GACTTGCCCTTTTCCACTTTG |

## c Primer sequences for copy number of dCas9

| Gene          | Forward              | Reverse               |
|---------------|----------------------|-----------------------|
| <i>dCas9</i>  | TGCCCCAAGTGAATATCGTG | GACTTGCCCTTTTCCACTTTG |
| <i>Ndufv1</i> | CTTCCCCACTGGCCTCAAG  | CCAAAACCCAGTGATCCAGC  |



## Supplementary table 2

**a**

Antibodies used in CHIP assay

| Antibody                            | Manufacturer            | Dilution rate |
|-------------------------------------|-------------------------|---------------|
| anti-trimethyl-histone H3 (Lys4)    | Merck Millipore, 07-473 | 1:267         |
| anti-trimethyl-histone H3 (Lys27)   | Abcam, ab6002           | 1:267         |
| anti-trimethyl-histone H3 (Lys9)    | Abcam, ab8898           | 1:267         |
| anti-DNA methyltransferase (Dnmt)1  | Abcam, ab13537          | 1:267         |
| anti-DNA methyltransferase (Dnmt)3a | Abcam, ab2850           | 1:267         |
| anti-DNA methyltransferase (Dnmt)3b | Abcam, ab2851           | 1:267         |
| anti-RNA polymerase (pol) II        | Abcam, ab5408           | 1:267         |
| anti-rabbit IgG                     | Abcam, ab171870         | 1:300         |
| anti-mouse IgG                      | Abcam, ab18413          | 1:300         |

**b**

Primer sequences for CHIP assay

| Gene                        | Forward              | Reverse              |
|-----------------------------|----------------------|----------------------|
| <i>mFgf21</i> (-997/-923bp) | AGGCCCGAATGCTAAGC    | AGCCCAGCAGGTGGAAGTCT |
| <i>mFgf21</i> (-106/+21bp)  | TGGAATTCAGGTCCTGCCAA | GAGAAGACACTAAGGCTGTC |
| <i>Gapdh</i>                | ACCAGGGAGGGCTGCAGTCC | TCAGTTCGGAGCCCACACGC |
| <i>MyoD</i>                 | GCCCGCAGTAGCAAAGTAAG | GAAACCGGATCCAAGTAGCA |

**c**

Primer sequences for bisulfite sequencing

| Gene          | Forward                    | Reverse                   |
|---------------|----------------------------|---------------------------|
| <i>mFgf21</i> | AGTGGTGAGAATTTAGGAGTTTTTTT | TCCTCCAAATTTAAAAATACAAACC |

**d**

Primer sequences for bisulfite sequencing (off target)

| Gene                   | Forward                        | Reverse                         |
|------------------------|--------------------------------|---------------------------------|
| gRNA 1<br>off target   | TATATTTTTTTAAAGAAAGTTGTAGT     | ACAACACTAATCAAATTAATATTTTT      |
| gRNA 2<br>off target 1 | TAAGGGAGAAAGAGGAGAAAGTTTTAT    | CAAACACTAACCTTAAACTCAAAAATCTACC |
| gRNA 2<br>off target 2 | TTAGGAATTTTGGTTTTTTAAAGTAGGGAT | CAAATAAACTCCATAAAAATAAAACCC     |
| gRNA 2<br>off target 3 | ATTTTTATTTTTTTGATGGTTAAGGAT    | TTCTTTTATACTCTTTATAACCCAAACTAA  |
| gRNA 2<br>off target 4 | TGGGATTTGAATTTAGGATTTTTAG      | CAATTCCATCACCTTTTTTAATTATATTATC |
